# Supplementary material
Source: Springer Nature journal article supplement (https://www.springermedizin.de/resource/supplementary/13046_2013_730_MOESM3_ESM.pdf/9662822)

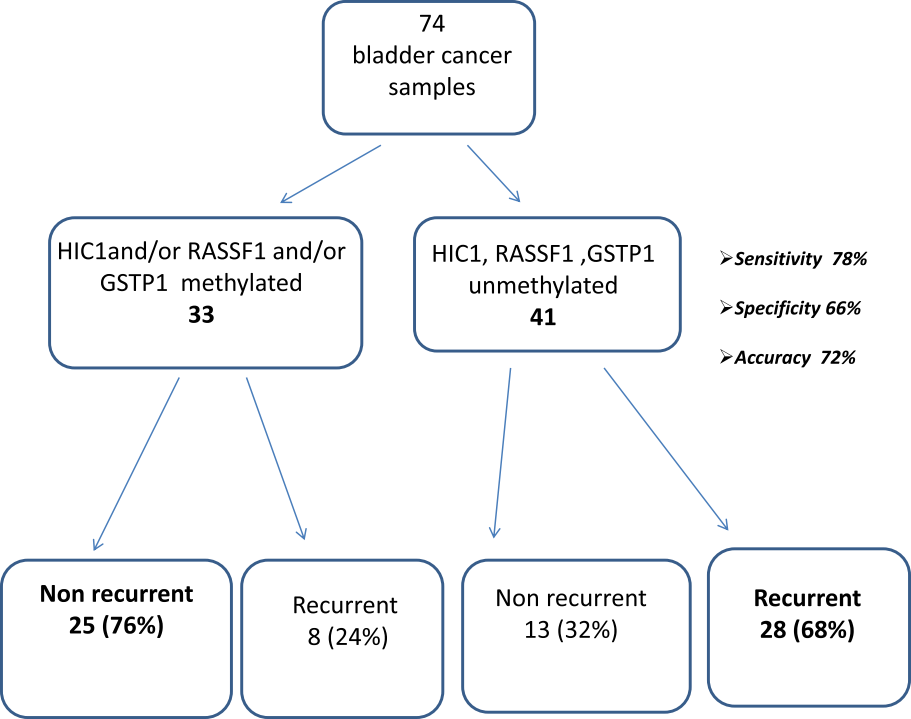

Supplement: MOESM3 [file 9662822]
